# Supplementary material for: Trophectoderm-Specific Knockdown of LIN28 Decreases Expression of Genes Necessary for Cell Proliferation and Reduces Elongation of Sheep Conceptus
Source: PubMed Central journal article supplement (PMC7177537; doi:10.3390/ijms21072549), 2020-04-06
Supplement: ijms-21-02549-s001.pdf [file ijms-21-02549-s001.pdf]

## Supplementary Materials

Supplementary table 1: shRNA oligos

|        |               |                                                                         |
|--------|---------------|-------------------------------------------------------------------------|
| LIN28A | Forward Oligo | 5' CCGGGCATCTGTAAGTGGTTCAACGTTCAAGAGACG<br>TTGAACCACTTACAGATGCTTTTTG 3' |
|        | Reverse Oligo | 5' AATTCAAAAAGCATCTGTAAGTGGTTCAACGTCTCT<br>TGAACGTTGAACCACTTACAGATGC 3' |
| LIN28B | Forward Oligo | 5' CCGGGGATTCATCTCCATGATAAGCTTCAAGAGAGC<br>TTATCATGGAGATGAATCCTTTTTG 3' |
|        | Reverse Oligo | 5' AATTCAAAAAGGATTCATCTCCATGATAAGCTCTCT<br>TGAAGCTTATCATGGAGATGAATCC 3' |
| SC     | Forward Oligo | 5' CCGGAGTTAAAGGTTCCGGCACGAATTCAAGAGATTC<br>GTGCCGAACCTTTAACTCTTTTTG 3' |
|        | Reverse Oligo | 5' AATTCAAAAAGAGTTAAAGGTTCCGGCACGAATCTC<br>TTGAATTCGTGCCGAACCTTTAACT 3' |

Supplementary table 2: Primers for LIN28A and LIN28B Expression

|                      |               |                                    |
|----------------------|---------------|------------------------------------|
| LIN28A<br>Expression | Forward Oligo | 5' GCTAGCCAGACTACCATGGGCTCTGTG 3'  |
|                      | Reverse Oligo | 5' ATTTAAATACCCACTGTGGCTTCAATTC 3' |
| LIN28B<br>Expression | Forward Oligo | 5' GCTAGCGCCGGAAAGAATTAGTTTCGC 3'  |
|                      | Reverse Oligo | 5' ATTTAAATACATAACACATGACACCCT 3'  |

Supplementary table 3: Realtime RTPCR Primers

|                |               |                               |
|----------------|---------------|-------------------------------|
| LIN28A         | Forward Oligo | 5' GACAGGTGCTACAACCTGTGGAG 3' |
|                | Reverse Oligo | 5' ATGGCAGAGCTATGGATCTCTT 3'  |
| LIN28B         | Forward Oligo | 5' GCCTTGAATCAATACGGGTAAC 3'  |
|                | Reverse Oligo | 5' CTTCTTTGGCTGAGGAGGTAGA 3'  |
| IGF2BP1 (IMP1) | Forward Oligo | 5' GCAACCTGAAGAAGGTGGAG 3'    |
|                | Reverse Oligo | 5' GCAGCCACGTCATTCTCATA 3'    |
| IGF2BP2 (IMP2) | Forward Oligo | 5' TCCCGGGTAGACATCCATAG 3'    |
|                | Reverse Oligo | 5' GTGGGCCAAGATCTTCAGAG 3'    |

|                |               |    |                        |    |
|----------------|---------------|----|------------------------|----|
| IGF2BP3 (IMP3) | Forward Oligo | 5' | TGCCGCTGAGAAGTCAATTA   | 3' |
|                | Reverse Oligo | 5' | TCCGTCCTTCCTTACCAATG   | 3' |
| HMGA1          | Forward Oligo | 5' | AAGGGGAGCAAAAACAAGG    | 3' |
|                | Reverse Oligo | 5' | CCTCCTCTTCCTCCTTCTCC   | 3' |
| ARID3B         | Forward Oligo | 5' | AAGGTGATGGAGTCCCAGTG   | 3' |
|                | Reverse Oligo | 5' | CCTCTTCTGACAGCCTGGAC   | 3' |
| c-MYC          | Forward Oligo | 5' | CTTCTCCCCCTCCTCTGACT   | 3' |
|                | Reverse Oligo | 5' | GCCTCTTTCCACAGAGACAA   | 3' |
| S15            | Forward Oligo | 5' | ATCATTCTGCCCCGAGATGGTG | 3' |
|                | Reverse Oligo | 5' | TGCTTGACGGGCTTGTAGGTG  | 3' |

Table 4: Antibodies

| <b>Protein</b>         | <b>Vendor</b> | <b>Catalog #</b> | <b>Host Species</b> | <b>Dilution used</b> | <b>Band size</b> |
|------------------------|---------------|------------------|---------------------|----------------------|------------------|
| LIN28A                 | Abcam         | ab63740          | Rabbit              | 1:1000               | 30 kDa           |
| LIN28B                 | Bethyl Labs   | A303-588A        | Rabbit              | 1:2000               | 35 kDa           |
| IGF2BP1                | Abcam         | ab82968          | Rabbit              | 1:500                | 63 kDa           |
| IGF2BP2                | Abcam         | ab124930         | Rabbit              | 1:3000               | 60-66 kDa        |
| IGF2BP3                | Abcam         | ab225697         | Rabbit              | 1:3000               | 64 kDa           |
| c-MYC                  | Abcam         | ab32             | Mouse               | 1:1000               | 45 kDa           |
| HMGA1                  | Abcam         | ab226850         | Rabbit              | 1:1000               | 17 kDa           |
| ARID3B                 | Bethyl Labs   | A302-565A        | Rabbit              | 1:4000               | 70 kDa           |
| GAPDH                  | Abcam         | ab9485           | Rabbit              | 1:3000               | 37 kDa           |
| $\beta$ -actin         | SCBT          | sc-47778         | Mouse               | 1:2000               | 45 kDa           |
| $\alpha$ -tubulin      | Abcam         | ab4074           | Rabbit              | 1:3000               | 50 kDa           |
| Goat anti-rabbit (HRP) | Abcam         | ab97051          | Goat                | 1:3000               | Secondary (HRP)  |
| Goat anti-mouse (HRP)  | Abcam         | ab97023          | Goat                | 1:3000               | Secondary (HRP)  |
